# Supplementary material
Source: PubMed Central journal article supplement (PMC9568283)
Supplement: mmc1.pdf [file mmc1.pdf]

**Effects of natural polymorphisms in SARS-CoV-2 RNA-dependent RNA polymerase on its activity and sensitivity to inhibitors *in vitro***

**Nataliya Miropolskaya, Maxim Kozlov, Ivan Petushkov, Maria Prostova, Danil Pupov, Daria Esyunina, Sergey Kochetkov, Andrey Kulbachinskiy**

**Supplementary Information**

Contains 1 Supplementary Table and 8 Supplementary Figures

**Table S1. Frequencies of amino acid substitutions at indicated positions of nsp12.** The data were retrieved from the GISAID database [21], accessed at the COVID CG site on 25.05.2022, counted for the periods from the start of pandemic until 25.05.2021 (1,893,772 genomic sequences) and 24.05.2022 (11,750,010 genomic sequences). The data for the Omicron lineage for the same period were retrieved on 21.09.2022 (2,789,360 Omicron lineage sequences). Substitutions are given in comparison with the reference sequence of the WIV04 SARS-CoV-2 strain (GenBank: MN996528.1). Substitutions analyzed in this study are shown in yellow. The frequencies of substitutions in the Omicron lineage are shown relative to the total number of sequenced Omicron genomes.

| 24 May 2021, all genomes |          |                       | 25 May 2022, all genomes |          |                       | 25 May 2022, Omicron lineage |          |                       |
|--------------------------|----------|-----------------------|--------------------------|----------|-----------------------|------------------------------|----------|-----------------------|
| Substitution             | # of seq | frequency             | Substitution             | # of seq | frequency             | Substitution                 | # of seq | frequency             |
| A443S                    | 1699     | 0.000897              | A443S                    | 5580     | 0.000475              | A443S                        | 31       | 1.03*10 <sup>-5</sup> |
| A443V                    | 911      | 0.000481              | A443V                    | 2190     | 0.000186              | A443V                        | 103      | 3.43*10 <sup>-5</sup> |
| A443T                    | 3        | 1.58*10 <sup>-6</sup> | A443T                    | 292      | 2.49*10 <sup>-5</sup> | A443T                        | 1        | 3.33*10 <sup>-7</sup> |
|                          |          |                       | A443P                    | 7        | 5.96*10 <sup>-7</sup> |                              |          |                       |
|                          |          |                       | A443G                    | 5        | 4.26*10 <sup>-7</sup> |                              |          |                       |
| D445N                    | 513      | 0.000271              | D445N                    | 928      | 7.9*10 <sup>-5</sup>  | D445N                        | 61       | 2.03*10 <sup>-5</sup> |
| D445G                    | 451      | 0.000238              | D445G                    | 1174     | 9.99*10 <sup>-5</sup> | D445G                        | 318      | 1.06*10 <sup>-4</sup> |
| D445Y                    | 22       | 1.16*10 <sup>-5</sup> | D445Y                    | 112      | 9.53*10 <sup>-6</sup> | D445Y                        | 4        | 1.33*10 <sup>-6</sup> |
| D445A                    | 3        | 1.58*10 <sup>-6</sup> | D445A                    | 24       | 2.04*10 <sup>-6</sup> | D445V                        | 4        | 1.33*10 <sup>-6</sup> |
| D445*10                  | 1        | 5.28*10 <sup>-7</sup> | D445C                    | 12       | 1.02*10 <sup>-6</sup> |                              |          |                       |
|                          |          |                       | D445*10                  | 12       | 1.02*10 <sup>-6</sup> |                              |          |                       |
|                          |          |                       | D445V                    | 9        | 7.66*10 <sup>-7</sup> |                              |          |                       |
| L514F                    | 507      | 0.000268              | L514F                    | 2007     | 0.000171              | L514F                        | 47       | 1.56*10 <sup>-5</sup> |
| L514I                    | 8        | 4.22*10 <sup>-6</sup> | L514I                    | 147      | 1.25*10 <sup>-5</sup> | L514I                        | 12       | 4*10 <sup>-6</sup>    |
| L514V                    | 3        | 1.58*10 <sup>-6</sup> | L514P                    | 10       | 8.51*10 <sup>-7</sup> | L514P                        | 5        | 1.66*10 <sup>-6</sup> |
| L514P                    | 2        | 1.06*10 <sup>-6</sup> | L514V                    | 8        | 6.81*10 <sup>-7</sup> |                              |          |                       |
| R583G                    | 1071     | 0.000566              | R583G                    | 1880     | 0.00016               | R583G                        | 80       | 2.66*10 <sup>-5</sup> |
| R583K                    | 42       | 2.22*10 <sup>-5</sup> | R583K                    | 109      | 9.28*10 <sup>-6</sup> | R583K                        | 36       | 1.2*10 <sup>-5</sup>  |
| R583T                    | 21       | 1.11*10 <sup>-5</sup> | R583S                    | 39       | 3.32*10 <sup>-6</sup> | R583S                        | 24       | 8*10 <sup>-6</sup>    |
| R583S                    | 13       | 6.86*10 <sup>-6</sup> | R583T                    | 31       | 2.64*10 <sup>-6</sup> | R583I                        | 7        | 2.33*10 <sup>-6</sup> |
| R583I                    | 5        | 2.64*10 <sup>-6</sup> | R583I                    | 25       | 2.13*10 <sup>-6</sup> |                              |          |                       |
| M794V                    | 33       | 1.74*10 <sup>-5</sup> | M794V                    | 88       | 7.49*10 <sup>-6</sup> | M794V                        | 15       | 4.99*10 <sup>-6</sup> |
| M794I                    | 43       | 2.27*10 <sup>-5</sup> | M794T                    | 28       | 2.38*10 <sup>-6</sup> | M794L                        | 6        | 2*10 <sup>-6</sup>    |
| M794T                    | 4        | 2.11*10 <sup>-6</sup> | M794L                    | 15       | 1.28*10 <sup>-6</sup> | M794I                        | 80       | 2.66*10 <sup>-5</sup> |
| M794R                    | 1        | 5.28*10 <sup>-7</sup> | M794R                    | 2        | 1.7*10 <sup>-7</sup>  |                              |          |                       |
| M794L                    | 1        | 5.28*10 <sup>-7</sup> | M794S                    | 1        | 8.51*10 <sup>-8</sup> |                              |          |                       |
|                          |          |                       | M794Q                    | 1        | 8.51*10 <sup>-8</sup> |                              |          |                       |
|                          |          |                       | M794K                    | 1        | 8.51*10 <sup>-8</sup> |                              |          |                       |
| S795F                    | 219      | 0.000116              | S795F                    | 2790     | 0.000237              | S795F                        | 90       | 3*10 <sup>-5</sup>    |
| S795Y                    | 10       | 5.28*10 <sup>-6</sup> | S795A                    | 54       | 4.6*10 <sup>-6</sup>  | S795A                        | 19       | 6.33*10 <sup>-6</sup> |
| S795P                    | 9        | 4.75*10 <sup>-6</sup> | S795Y                    | 43       | 3.66*10 <sup>-6</sup> | S795Y                        | 5        | 1.66*10 <sup>-6</sup> |
| S795C                    | 9        | 4.75*10 <sup>-6</sup> | S795P                    | 38       | 3.23*10 <sup>-6</sup> | S795P                        | 6        | 2*10 <sup>-6</sup>    |
| S795A                    | 2        | 1.06*10 <sup>-6</sup> | S795C                    | 38       | 3.23*10 <sup>-6</sup> | S795C                        | 10       | 3.33*10 <sup>-6</sup> |
|                          |          |                       | S795T                    | 2        | 1.7*10 <sup>-7</sup>  |                              |          |                       |
| N911K                    | 38       | 2.01*10 <sup>-5</sup> | N911K                    | 368      | 3.13*10 <sup>-5</sup> | N911K                        | 109      | 3.63*10 <sup>-5</sup> |
| N911S                    | 76       | 4.01*10 <sup>-5</sup> | N911S                    | 354      | 3.01*10 <sup>-5</sup> | N911S                        | 62       | 2.06*10 <sup>-5</sup> |
| N911D                    | 23       | 1.21*10 <sup>-5</sup> | N911D                    | 96       | 8.17*10 <sup>-6</sup> | N911D                        | 19       | 6.33*10 <sup>-6</sup> |
| N911T                    | 5        | 2.64*10 <sup>-6</sup> | N911T                    | 46       | 3.91*10 <sup>-6</sup> |                              |          |                       |
| N911Y                    | 2        | 1.06*10 <sup>-6</sup> | N911Y                    | 12       | 1.02*10 <sup>-6</sup> |                              |          |                       |
|                          |          |                       | N911H                    | 7        | 5.96*10 <sup>-7</sup> |                              |          |                       |

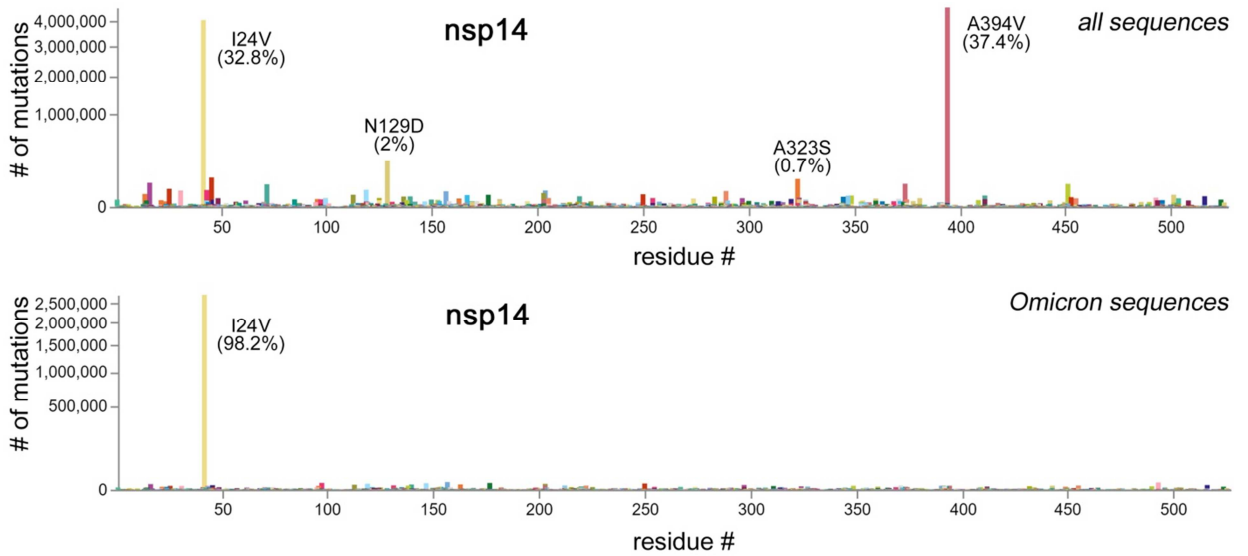

**Figure S1.** Frequencies of amino acid substitutions found in nsp14 for the period from the start of pandemic until 25.05.2022, for all sequenced SARS-CoV-2 genomes (*top*, 12,365,901 genomes) and for the Omicron lineage (*bottom*, 2,789,360 genomes). The data were retrieved from the GISAID database on 21.09.2022 [21]. The number of sequenced genomes containing substitutions at each nsp14 position is shown on the y-axis (log scale). Substitutions are shown relative to the reference strain WIV04. Most frequent substitutions and their percentage among all SARS-CoV-2 sequences are indicated.

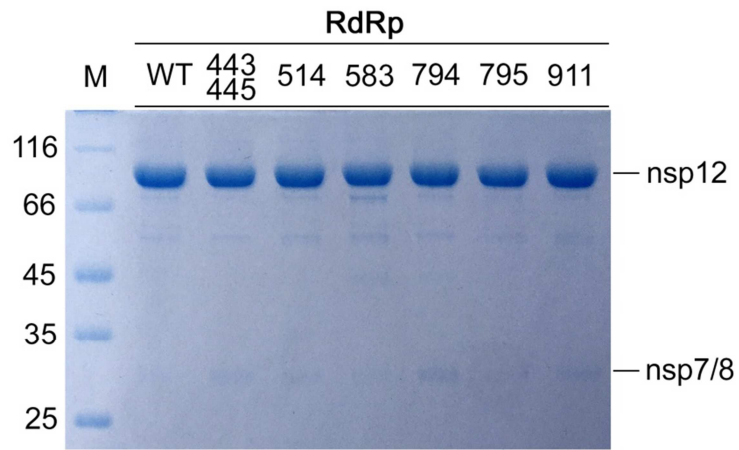

**Figure S2. SDS-PAGE analysis of wild-type and mutant RdRp variants analyzed in this study.** Each RdRp sample was purified by Ni-affinity (HiTrap TALON crude column) and anion exchange (HiScreenQ HP column) chromatography. Positions of the nsp12 and fused nsp7-nsp8 subunits are indicated.

**A**

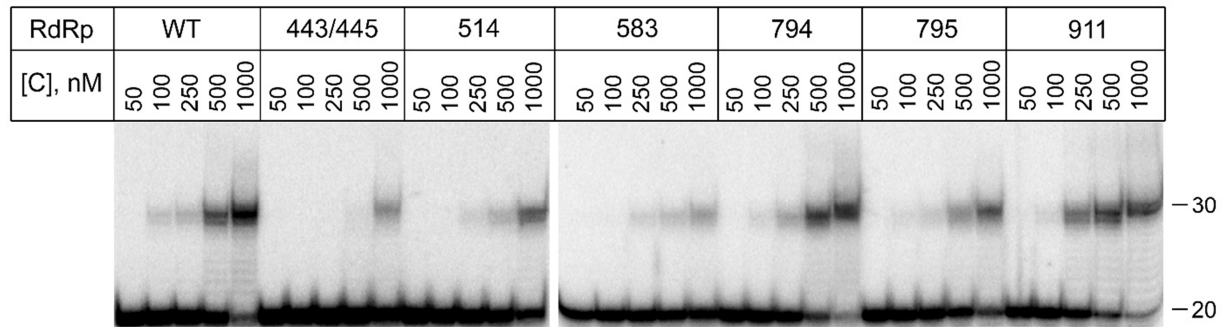

**B**

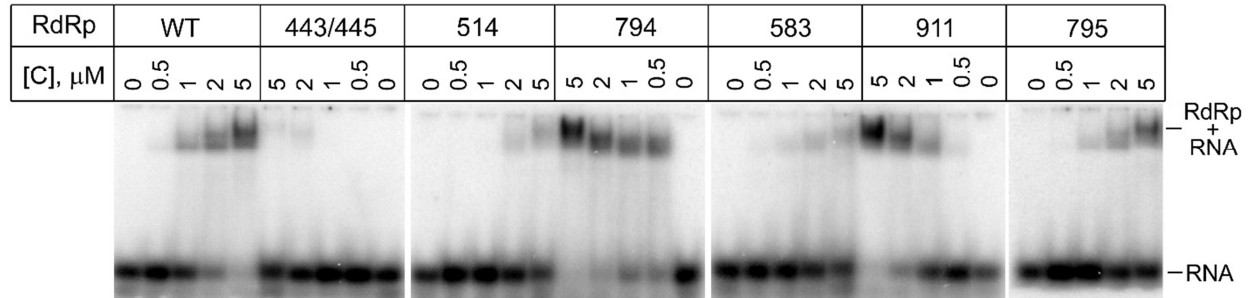

**Figure S3. Analysis of the relative activity and RNA binding by the wild-type and mutant RdRp variants.** (A) Analysis of RNA extension at different RdRp concentrations. Positions of the starting RNA primer (20 nt) and the extended RNA product (30 nt) are indicated. (B) Analysis of RNA binding by the wild-type and mutant RdRp variants. Increasing amounts of RdRp were incubated with pre-annealed primer-template duplex containing a 5'-P<sup>32</sup>-labeled RNA primer and the samples were run on native 5% PAGE. Positions of the free RNA substrate and the RdRp-RNA complex are indicated.

3' -CGAUACACUCUAAAUCUAAAUUUUUUUUUU-5'  
 5' -GCUAUGUGAGAUUAAGAAUU-3'

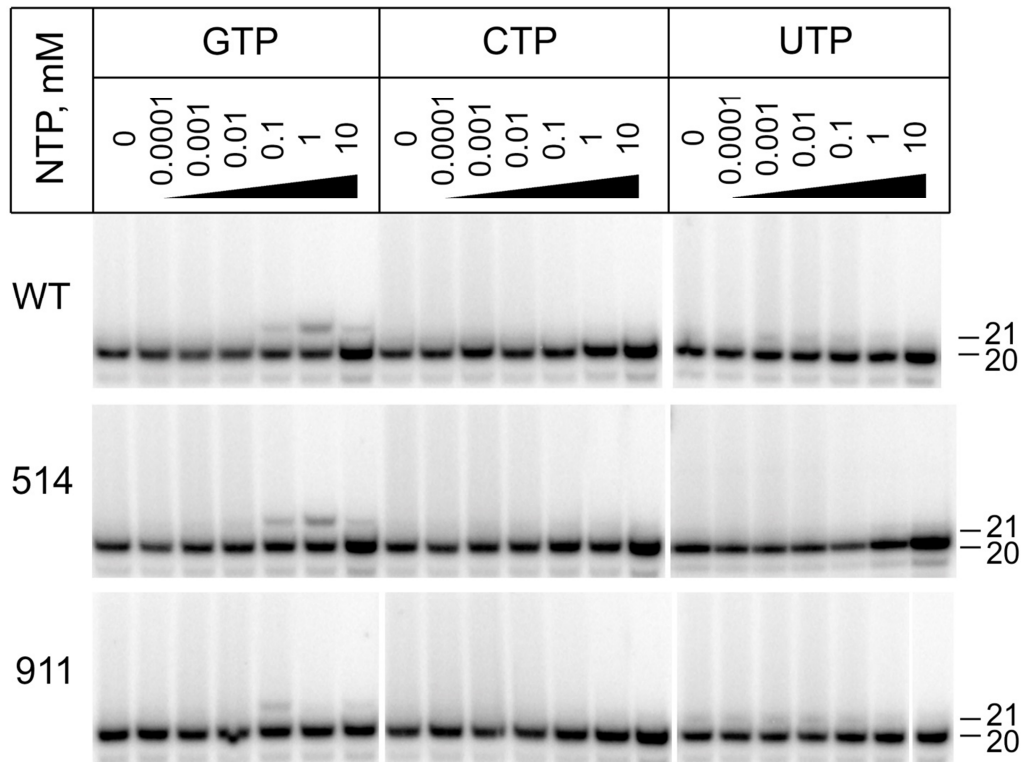

**Figure S4. Analysis of nucleotide misincorporation by the wild-type and L514F and N911K RdRp variants.** The RNA substrate is shown on the top (primer, yellow; template, blue). RdRp (500 nM) was incubated with primer-template RNA (50 nM) for 5' at 30°C, individual non-complementary NTPs were added to indicated concentrations ( ) and RNA extension was performed for 10 seconds at 30 °C. The results of a single measurement are presented. Positions of the starting RNA primer (20 nt) and the extended RNA product (21 nt) are indicated.

**Figure S5. Structures of non-nucleoside compounds tested in this study.**

Pages 8-12.

(A) Hydrazons of polyhydroxybenzaldehydes (PP). (B) Diketoacids (DA). (C) Analogs of diketoacids (DAA).

(D) Hydroxyquinolines (HQ).

For each compound, its abbreviation, chemical structure and chemical name are shown. For DAA and HQ,  $^1\text{H}$  NMR spectra are presented.

# A

## Polyphenols (PPs)

| <i>Abr.</i> | <i>Structure</i> | <i>Name</i>                                                           |
|-------------|------------------|-----------------------------------------------------------------------|
| PP1         |                  | (E)-4-((morpholinoimino)methyl)benzene-1,2-diol                       |
| PP2         |                  | (E)-3-((morpholinoimino)methyl)benzene-1,2-diol                       |
| PP3         |                  | (E)-4-((morpholinoimino)methyl)benzene-1,2,3-triol                    |
| PP4         |                  | (E)-4-(((4-methylpiperazin-1-yl)imino)methyl)benzene-1,2-diol         |
| PP5         |                  | (E)-4-(((4-methylpiperazin-1-yl)imino)methyl)benzene-1,2,3-triol      |
| PP6         |                  | (E)-5-((2-(2,4-dinitrophenyl)hydrazineylidene)methyl)benzene-1,3-diol |



| Abr. | Structure | Name                                                                                                                    |
|------|-----------|-------------------------------------------------------------------------------------------------------------------------|
| PP7  |           | <i>(E)</i> -3-((2-(2,4-dinitrophenyl)hydrazineylidene)methyl)benzene-1,2-diol                                           |
| PP8  |           | <i>(E)</i> -4-((2-(2,4-dinitrophenyl)hydrazineylidene)methyl)benzene-1,2,3-triol                                        |
| PP9  |           | 4,4'-((1 <i>E</i> ,1' <i>E</i> )-(piperazine-1,4-diylbis(azaneylylidene))bis(methaneylylidene))bis(benzene-1,2-diol)    |
| PP10 |           | 4,4'-((1 <i>E</i> ,1' <i>E</i> )-(piperazine-1,4-diylbis(azaneylylidene))bis(methaneylylidene))bis(benzene-1,2,3-triol) |
| PP11 |           | 5,5'-((1 <i>E</i> ,1' <i>E</i> )-(piperazine-1,4-diylbis(azaneylylidene))bis(methaneylylidene))bis(benzene-1,2,3-triol) |

# B

## Diketo Acids (DAs)

| <i>Abr.</i> | <i>Structure</i>                                                                    | <i>Name</i>                                                          |
|-------------|-------------------------------------------------------------------------------------|----------------------------------------------------------------------|
| DA1         | 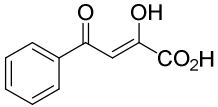   | (Z)-2-hydroxy-4-oxo-4-phenylbut-2-enoic acid                         |
| DA2         |    | (Z)-2-hydroxy-4-oxo-4-(2-propoxyphenyl)but-2-enoic acid              |
| DA3         |    | (Z)-4-(2-(3-cyanopropoxy)phenyl)-2-hydroxy-4-oxobut-2-enoic acid     |
| DA4         |   | (Z)-4-(2-(3-carboxypropoxy)phenyl)-2-hydroxy-4-oxobut-2-enoic acid   |
| DA5         |  | (Z)-4-(3-(benzyloxy)phenyl)-2-hydroxy-4-oxobut-2-enoic acid          |
| DA6         |  | (Z)-4-(3-((2-cyanobenzyl)oxy)phenyl)-2-hydroxy-4-oxobut-2-enoic acid |
| DA7         |  | (Z)-2-((3-(3-carboxy-3-hydroxyacryloyl)phenoxy)methyl)benzoic acid   |

# C

## Diketo Acid Analogs (DAAs)

| Abr. | Structure | Name                                                           |
|------|-----------|----------------------------------------------------------------|
| DAA1 |           | 1-hydroxy-6-oxo-4-phenyl-1,6-dihydropyridine-2-carboxylic acid |

<sup>1</sup>H NMR (400 MHz, DMSO-d<sub>6</sub>)

δ 7.79–7.71 (m, 2H), 7.53–7.45 (m, 3H), 7.00 (d, *J* = 2.3 Hz, 1H), 6.97 (d, *J* = 2.4 Hz, 1H). <sup>13</sup>C NMR (101 MHz, DMSO-d<sub>6</sub>) δ 161.80, 157.14, 147.50, 138.97, 135.90, 129.58, 129.03, 126.71, 115.95, 104.45.

|      |  |                                                                |
|------|--|----------------------------------------------------------------|
| DAA2 |  | 4-hydroxy-3-oxo-6-phenyl-3,4-dihydropyrazine-2-carboxylic acid |
|------|--|----------------------------------------------------------------|

<sup>1</sup>H NMR (400 MHz, DMSO-d<sub>6</sub>)

δ 8.91 (s, 1H), 7.92 (d, *J* = 7.4 Hz, 2H), 7.45 (t, *J* = 7.6 Hz, 2H), 7.36 (t, *J* = 7.3 Hz, 1H). <sup>13</sup>C NMR (101 MHz, DMSO-d<sub>6</sub>) δ 164.19, 150.74, 142.86, 134.41, 131.75, 128.70, 128.13, 128.05, 124.99.

|                 |  |                                                    |
|-----------------|--|----------------------------------------------------|
| DAA3<br>(Cmpd3) |  | 5,6-dihydroxy-2-phenylpyrimidine-4-carboxylic acid |
|-----------------|--|----------------------------------------------------|

# D

## Hydroxyquinolines (HQs)

| Abr.             | Structure                                                                                                                                                                                                                                                                                                                                                                                                                                                                                                                                    | Name                                                                                        |
|------------------|----------------------------------------------------------------------------------------------------------------------------------------------------------------------------------------------------------------------------------------------------------------------------------------------------------------------------------------------------------------------------------------------------------------------------------------------------------------------------------------------------------------------------------------------|---------------------------------------------------------------------------------------------|
| HQ1<br>(Cmpd13e) | 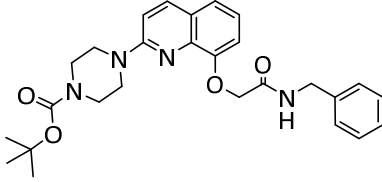                                                                                                                                                                                                                                                                                                                                                                                                                                                            | <i>tert</i> -butyl 4-(8-(2-(benzylamino)-2-oxoethoxy)quinolin-2-yl)piperazine-1-carboxylate |
| HQ2              |                                                                                                                                                                                                                                                                                                                                                                                                                                                             | 2-((2-(1 <i>H</i> -imidazol-1-yl)quinolin-8-yl)oxy)- <i>N</i> -benzylacetamide              |
|                  | <sup>1</sup> H NMR (300 MHz, DMSO- <i>d</i> <sub>6</sub> )<br>δ 8.71 (s, 1H), 8.58 (d, <i>J</i> = 8.9 Hz, 2H), 8.10 – 8.01 (m, 2H), 7.66 (dd, <i>J</i> = 8.2, 1.0 Hz, 1H), 7.53 (t, <i>J</i> = 7.9 Hz, 1H), 7.38 – 7.20 (m, 6H), 7.16 (s, 1H), 4.86 (s, 2H), 4.41 (d, <i>J</i> = 6.1 Hz, 2H). <sup>13</sup> C NMR (75 MHz, DMSO- <i>d</i> <sub>6</sub> ) δ 168.24, 153.45, 147.09, 140.67, 139.52, 138.45, 136.02, 130.72, 128.76, 128.41, 127.72, 127.36, 126.95, 121.42, 117.17, 113.88, 113.35, 69.42, 42.41.                             |                                                                                             |
| HQ3              |                                                                                                                                                                                                                                                                                                                                                                                                                                                            | 2-((2-(1 <i>H</i> -imidazol-1-yl)quinolin-8-yl)oxy)- <i>N</i> -phenylacetamide              |
|                  | <sup>1</sup> H NMR (300 MHz, DMSO- <i>d</i> <sub>6</sub> )<br>δ 10.14 (s, 1H), 8.74 (s, 1H), 8.60 (d, <i>J</i> = 8.9 Hz, 1H), 8.15 (s, 1H), 8.07 (d, <i>J</i> = 8.8 Hz, 1H), 7.65 (t, <i>J</i> = 8.3 Hz, 3H), 7.54 (t, <i>J</i> = 7.9 Hz, 1H), 7.38 – 7.29 (m, 3H), 7.19 (s, 1H), 7.09 (t, <i>J</i> = 7.4 Hz, 1H), 5.02 (s, 2H). <sup>13</sup> C NMR (75 MHz, DMSO- <i>d</i> <sub>6</sub> ) δ 167.11, 153.64, 147.13, 140.72, 138.78, 138.51, 136.03, 130.74, 129.25, 128.49, 127.01, 124.20, 121.41, 120.02, 117.33, 113.91, 113.48, 69.41. |                                                                                             |

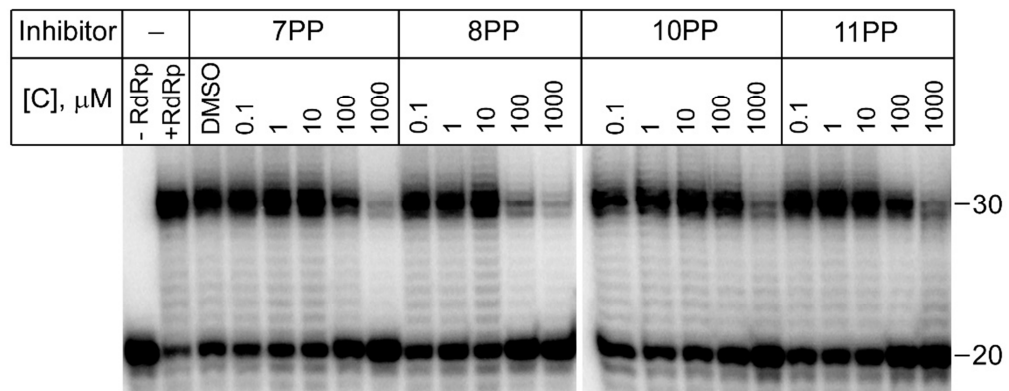

**Figure S6. Titration of selected polyphenol compounds (PP).** Preformed complex of wild-type RdRp with the RNA substrate was incubated with increasing concentrations of indicated compounds dissolved in DMSO, and RNA extension was analyzed after ATP addition. Control reactions contained either RdRp in the absence of inhibitors (“+RdRp”) or RdRp and DMSO only (“DMSO”). Positions of the starting RNA primer (20 nt) and the extended RNA product (30 nt) are indicated.

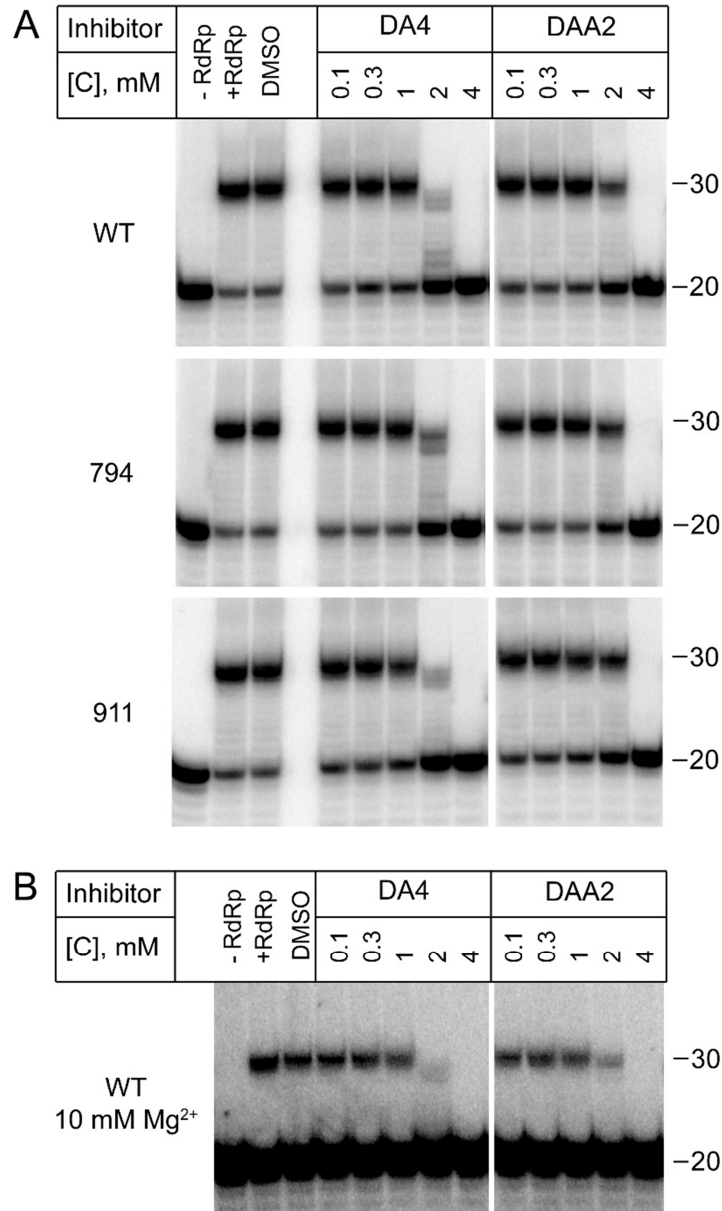

**Figure S7. Titration of selected DA and DAA compounds.** The reactions were performed in the reaction buffer containing 2 mM MgCl<sub>2</sub> (A) or 2 mM MgCl<sub>2</sub> (B). Preformed complex of wild-type or mutant (M794V and N911K) RdRp variants with the RNA substrate was incubated with increasing concentrations of indicated compounds dissolved in DMSO, and RNA extension was analyzed after ATP addition. Control reactions contained either RdRp in the absence of inhibitors (“+RdRp”) or RdRp and DMSO (“DMSO”). Positions of the starting RNA primer (20 nt) and the extended RNA product (30 nt) are indicated.

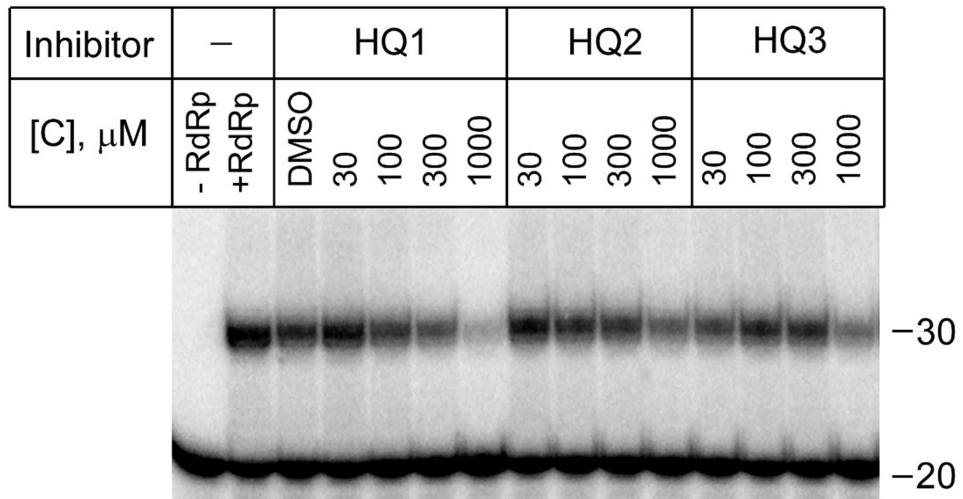

**Figure S8. Titration of HQ compounds.** Preformed complex of wild-type RdRp with the RNA substrate was incubated with increasing concentrations of indicated compounds dissolved in DMSO, and RNA extension was analyzed after ATP addition. Control reactions contained either RdRp in the absence of inhibitors (“+RdRp”) or RdRp and DMSO only (“DMSO”). Positions of the starting RNA primer (20 nt) and the extended RNA product (30 nt) are indicated.
